# Supplementary material
Source: PubMed Central journal article supplement (PMC3249119)
Supplement: supp_M111.314278_jbc.M111.314278-1.pdf [file supp_M111.314278_jbc.M111.314278-1.pdf]

## Supplementary Materials

### Data analysis

Competition-binding curves between [<sup>3</sup>H]NMS and ACh in the absence or presence of BQCA were fitted to a two-site allosteric ternary complex model (equation S1)

$$Y = \frac{[A]Frac_{Hi}}{[A] + \left(\frac{K_A K_B}{\alpha'[B] + K_B}\right) \left(1 + \frac{[I]}{K_H} + \frac{[B]}{K_B} + \frac{\alpha[I][B]}{K_H K_B}\right)} + \frac{[A](1 - Frac_{Hi})}{[A] + \left(\frac{K_A K_B}{\alpha'[B] + K_B}\right) \left(1 + \frac{[I]}{K_L} + \frac{[B]}{K_B} + \frac{\alpha[I][B]}{K_L K_B}\right)} \quad (S1)$$

where Y is percentage (vehicle control) binding, [A], [B], and [I] are the concentrations of [<sup>3</sup>H]NMS, BQCA and ACh respectively, K<sub>A</sub> and K<sub>B</sub> are the equilibrium dissociation constants of [<sup>3</sup>H]NMS and BQCA, respectively, K<sub>H</sub> and K<sub>L</sub> are the equilibrium dissociation constants of ACh for the high- and low-affinity receptor state, respectively, Frac<sub>Hi</sub> is the proportion of receptors in the high-affinity receptor state, and α' and α are the cooperativities between BQCA and [<sup>3</sup>H]NMS or ACh respectively.

**Table S1:** Allosteric ternary complex model (Equation S1) binding parameters for the interaction between BQCA, ACh and [<sup>3</sup>H]NMS at the hM<sub>1</sub> mAChR. Estimated parameter values represent the mean ± SEM of 3 experiments performed in duplicate.

| <b>Parameter</b>                  | <b>Value</b> |
|-----------------------------------|--------------|
| <b>pK<sub>B</sub><sup>a</sup></b> | 3.82 ± 0.11  |
| <b>pK<sub>H</sub><sup>b</sup></b> | 5.15 ± 0.23  |
| <b>pK<sub>L</sub><sup>c</sup></b> | 4.08 ± 0.24  |
| <b>Logα<sup>d</sup></b>           | 2.35 ± 0.30  |
| <b>Logα'<sup>e</sup></b>          | -100         |

<sup>a</sup> Negative logarithm of the equilibrium dissociation constant of BQCA.

<sup>b</sup> Negative logarithm of the high affinity equilibrium dissociation constant of ACh.

<sup>c</sup> Negative logarithm of the low affinity equilibrium dissociation constant of ACh.

<sup>d</sup> Logarithm of the binding cooperativity factor between BQCA and ACh .

<sup>e</sup> Logarithm of the binding cooperativity factor between BQCA and [<sup>3</sup>H]NMS; this parameter was constrained to an arbitrarily low value, consistent with very high negative cooperativity between the modulator and radioligand.

## Reference

- (1) ARUNLAKSHANA, O., and SCHILD, H. O. (1959) *Br J Pharmacol* **14**, 48–58

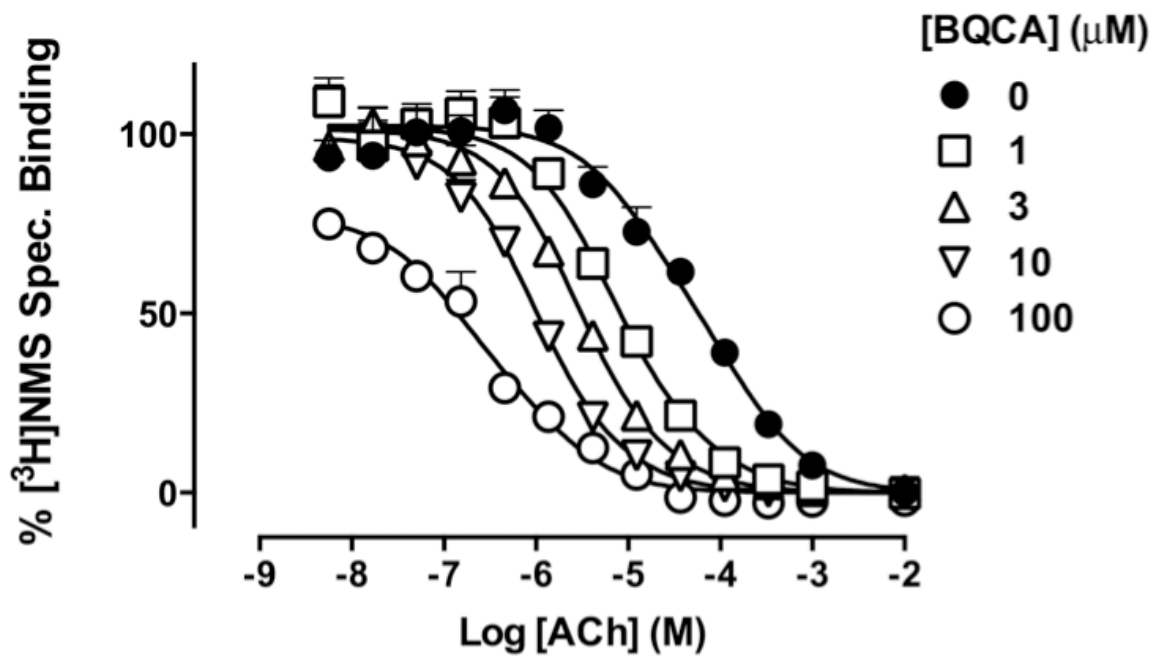

**Supplementary Figure 1. BQCA is a positive allosteric modulator of ACh binding affinity.** ACh-mediated inhibition of the equilibrium binding of [ $^3\text{H}$ ]NMS in the absence or presence of BQCA. Data points represent the mean + SEM of four independent experiments performed in triplicate. Curves drawn through the data points represent the best fit of a two-state allosteric ternary complex model (equation S1; Table S1).

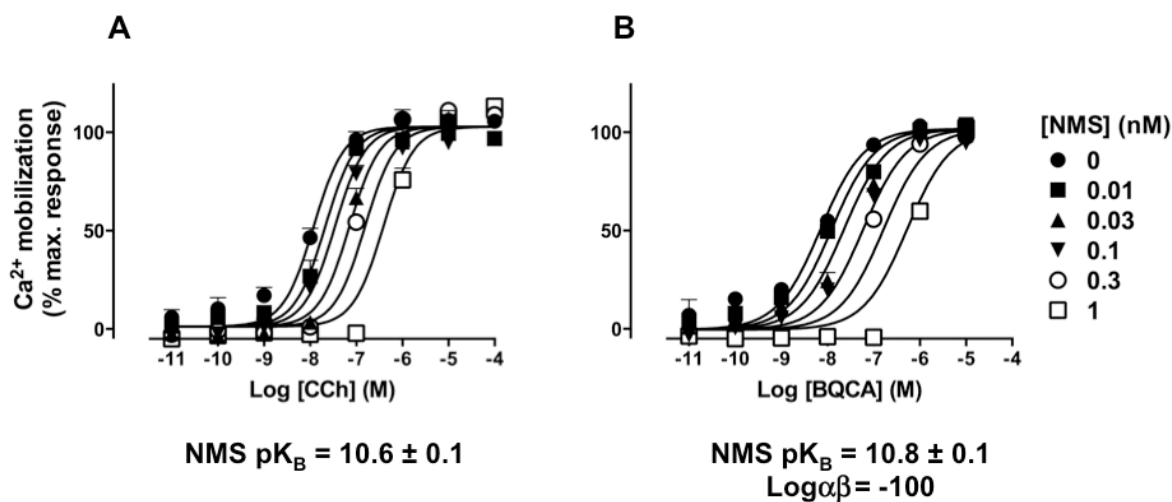

**Supplementary Figure 2. BQCA exhibits very high negative cooperativity with an inverse agonist.** Interaction between the inverse agonist, NMS, and **(A)** the orthosteric agonist, CCh or **(B)** the allosteric agonist/modulator, BQCA, in an assay of intracellular Ca<sup>2+</sup> mobilization. Data represent the mean + SEM of three independent experiments. Curves through the data represent the best fit of **(A)** a competitive model of interaction (1) or **(B)** an operational allosteric ternary complex model. For the latter, the global cooperativity parameter ( $\log\alpha\beta$ ) was not significantly different from -100, and was constrained as such.

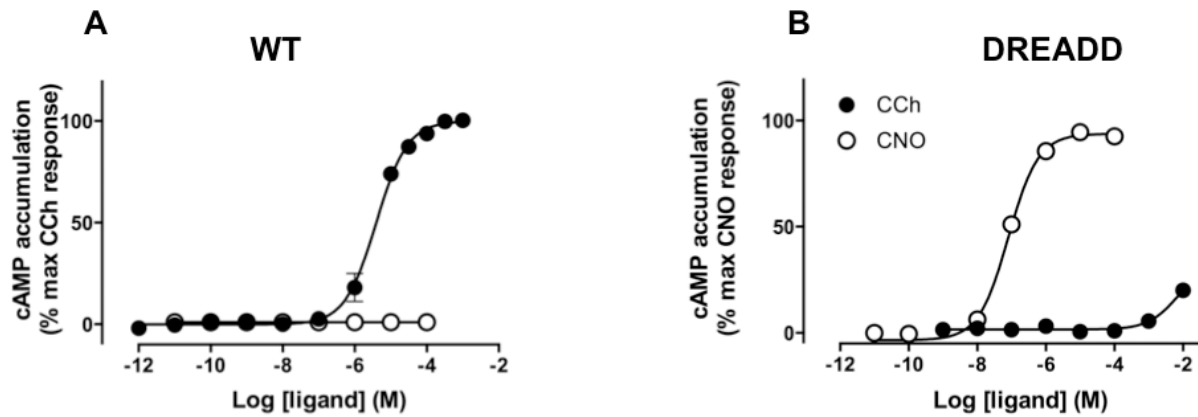

**Supplementary Figure 3. The DREADD  $M_1$  mAChR shows a loss of responsiveness to CCh, but a gain in responsiveness to clozapine-N-oxide (CNO).** Comparison of ligand signaling in a cAMP accumulation assay at the (A) wild type (WT) or (B) the DREADD ( $Y^{106}C/A^{196}G$ ) receptor. Data points represent the mean + SEM of three experiments.

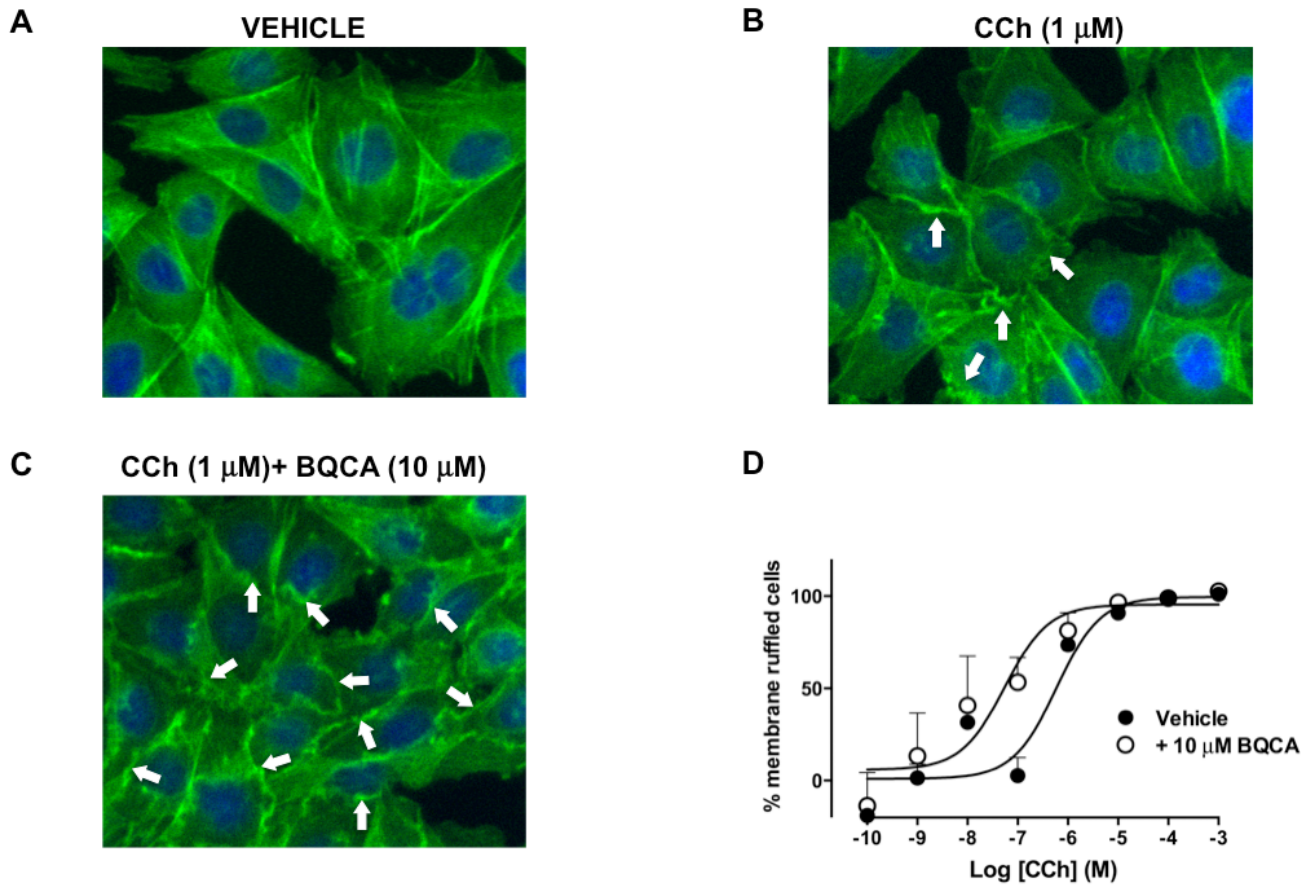

**Supplementary Figure 4. BQCA potentiates CCh-mediated membrane ruffling via the  $M_1$  mAChR.** (A-C) Epifluorescence micrographs of F1pIn CHO  $hM_1$  mAChR cells treated with ligand, fixed, stained with Hoechst 33342 nuclear dye (blue) and Alexa-568 phalloidin (green) and imaged using a 20X objective on an IN Cell 1000 analyzer. (A) Cells treated with serum-free media, which displayed smooth edges with an even distribution of actin at the membrane. (B) Cells treated with 1  $\mu$ M CCh, where some cells display a ruffled membrane consisting of convoluted actin structures at the membrane (white arrows). (C) Cells treated with 1  $\mu$ M CCh and 10  $\mu$ M BQCA, which mostly display a ruffled morphology (white arrows), indicating potentiation of the CCh response. (D) Concentration-response to CCh in the absence or presence of 10  $\mu$ M BQCA. Data are represented as mean percentage of cells exhibiting membrane ruffling in the absence of ligand + SEM collected from three experiments.
